# Supplementary material for: Chinese Residents’ Perceptions of COVID-19 During the Pandemic: Online Cross-sectional Survey Study
Source: PubMed Central journal article supplement (PMC7690970; doi:10.2196/21672), 2020-11-25
Supplement: jmir_v22i11e21672_app1.pdf [file jmir_v22i11e21672_app1.pdf]

## Multimedia Appendix 1: Survey questionnaire

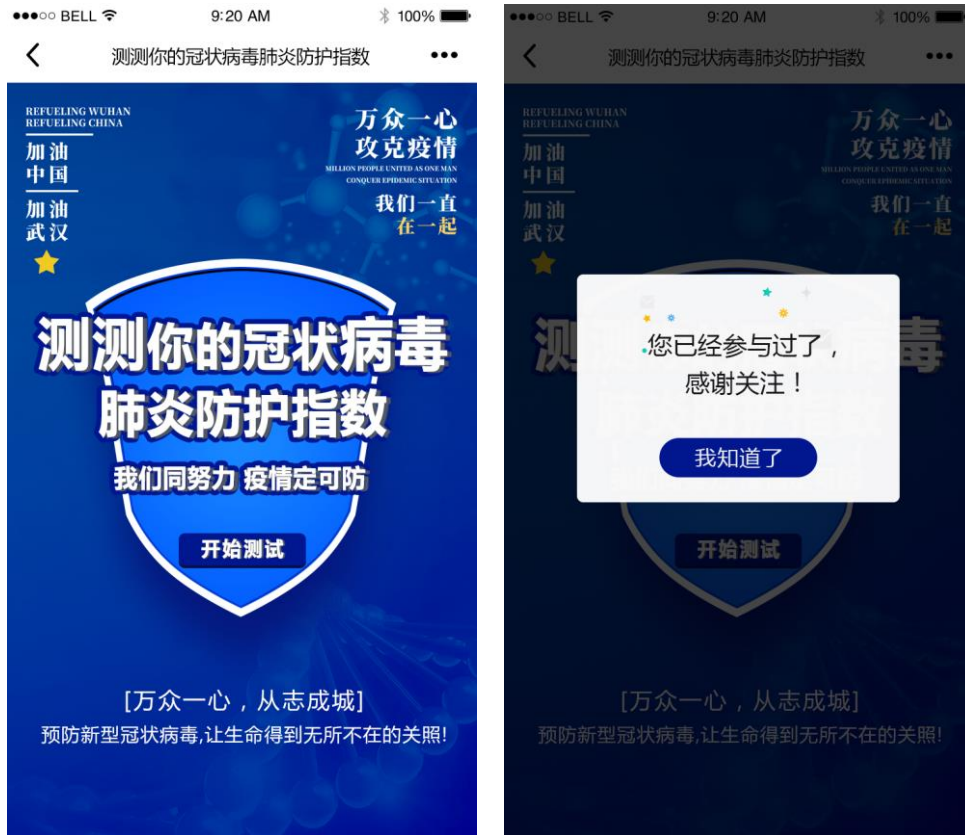

The left picture above is the front page of the survey questionnaire, and the right figure shows that the mobile phone holder has filled in the questionnaire.

### Knowledge section

1. Initial symptoms:

A fever, cough, fatigue

C panic, chest tightness, conjunctivitis

B nausea, vomiting, diarrhea

D all

2. Distribution of death cases:

A infant

C the elderly and those with chronic basic diseases

B middle-aged

D teenagers

3. Not the transmission routes:

A droplet spread

C contact spread

B mosquito bites

D all

4. Conditions for killing viruses:

A at 56 °C for 30 minutes

C at 16 °C for 10 minutes

B at 26 °C for 20 minutes

D at 0 °C for 5 minutes

5. Unsuitable mask selection:

A paper mask

C medical surgical mask

B disposable medical mask

D N95 protective mask

6. Medical observation days:

A 7 days

B 8 days

C 14 days

D 30 days

7. Fever temperature:

A 38°C            B 38.5°C            C 37.3°C            D 36.5°C

8. Possible COVID-19 infection after influenza vaccination:

A right            B wrong            C unclear

9. Selection of disinfection products:

A 75% alcohol            B chlorine-containing disinfectant (such as 84 disinfectant)  
C wash-free disinfectant            D all

10. Infectiousness of asymptomatic people:

A right            B wrong            C unclear

### **Skill section**

1. When coughing or sneezing, the correct treatment:

A cover your mouth and nose directly with your hand  
B cover your mouth and nose with a handkerchief, paper towel or elbow  
C no need to cover your mouth and nose  
D unclear

2. Incorrect measures of home quarantine:

A wear a mask, and try to keep more than one meter away from your family  
B participate in family meals, and share dishes and chopsticks  
C clean all objects and surfaces in high frequency contact every day  
D pay attention to drinking more water during quarantine

3. Incorrect measures from outside to inside:

A take off the outer clothes, and replace them with household clothes  
B after removing the mask, throw it into the garbage can and do not place it at will  
C wash hands after handling masks and clothes  
D close the window to prevent the outside air from entering

4. Incorrect mask use:

A it is recommended to replace every 2-4 hours  
B replace it as soon as possible in case of pollution  
C avoid hand contact with the inner face of the mask when wearing  
D the thicker the mask, the better the antiviral effect

5. Return notice:

A carry disinfectant wipes with you            B do not touch the outer surface of the mask  
C avoid touching eyes, mouth and nose with hands            D all

6. Washing hands correctly:

A flowing clear water            B rub soap or hand sanitizer thoroughly  
C duration is more than 15-20 seconds            D all

7. Precautions:

A wash hands before eating            B avoid going to crowded places  
C maintain indoor air circulation            D all

8. When there is fever during the travel by public transportation, where should I get off and isolate immediately:

A destination            B get off nearby            C do not get off            D departure station

9. Attention to household alcohol disinfection:

- A alcohol is a flammable substance, and should be used carefully
- B can be used for hand and skin and small-scale object surface
- C generally use 75% concentration
- D all

**Behavior section (0-3: “be unable to do” to “be able to do”)**

| Behavior                                         | Actual degree |
|--------------------------------------------------|---------------|
| 1.No partying                                    |               |
| 2.Wearing masks                                  |               |
| 3.Wearing gloves                                 |               |
| 4.Washing hands                                  |               |
| 5.No contact with live poultry                   |               |
| 6.Daily ventilation                              |               |
| 7.Weekly disinfection                            |               |
| 8.Distinction between common cold and COVID-19   |               |
| 9.Correct identification of epidemic information |               |
| 10.Workplace precautions                         |               |
| 11.Community precautions                         |               |

**Transmission section**

1. Information channels to learn protection knowledge:

- A government’s WeChat public account
- B information from WeChat and WeChat group of friends
- C microblog
- D TV, government’s websites and news outlets
- E communication between people around and relatives
- F others

2. Reliable information source of protection knowledge:

- A information released by government’s media and WeChat public account
- B information released by authoritative medical experts
- C information from WeChat and WeChat group of friends
- D information from people around and relatives
- E others

3. Information needs:

- A daily protection knowledge
- B latest epidemic development
- C disease treatment progress
- D current status of epidemic area prevention and control
- E material supply
- F social dynamics
- G others

**Personal characteristics**

1. Sex:

A male                      B female

2. Age (years):

A  $\leq 20$     B 21-30    C 31-40    D 41-50    E 51-60    F  $\geq 61$

3. Education level:

A junior high school and below

B high school and technical secondary school

C junior college and Bachelor

D master and above

4. Occupation:

A government agency and institution

B medical practitioner

C enterprise

D business and service industry

E farmer (including agriculture, forestry, animal husbandry, sideline occupations and fishery)

F student

G freelancer

H retiree

I unemployed

J others

5. Place of residence:

A urban area

B rural area
