# Supplementary material for: Chinese Residents’ Perceptions of COVID-19 During the Pandemic: Online Cross-sectional Survey Study
Source: PubMed Central journal article supplement (PMC7690970; doi:10.2196/21672), 2020-11-25
Supplement: jmir_v22i11e21672_app2.pdf [file jmir_v22i11e21672_app2.pdf]

**Multimedia Appendix 2: supplementary tables**

**Content**

|                                                                                                                                                                                                                                                                             |           |
|-----------------------------------------------------------------------------------------------------------------------------------------------------------------------------------------------------------------------------------------------------------------------------|-----------|
| <b>Table S1. Results of multivariate linear regression analysis on knowledge score, skill score and behavior score. ....</b>                                                                                                                                                | <b>2</b>  |
| <b>Table S2. Pearson Chi-square test for questions with high error rates in knowledge and skill sections, and questions with low proportion of “3 points” in behavior section.....</b>                                                                                      | <b>6</b>  |
| <b>Table S3. Results of binary logistic regression analysis on factors influencing the choice for initial symptoms, transmission routes, disinfection products, measures of home quarantine, weekly disinfection, and distinction between common cold and COVID-19.....</b> | <b>8</b>  |
| <b>Table S4. Proportion of information channels and reliable information sources for different characteristics (%)......</b>                                                                                                                                                | <b>11</b> |
| <b>Table S5. Proportion of information needs for different characteristics (%)......</b>                                                                                                                                                                                    | <b>13</b> |

**Table S1.** Results of multivariate linear regression analysis on knowledge score, skill score and behavior score.

| Variable                                                                       | Coefficient | SE    | 95% CI           | t test  | P value | Collinearity statistics (VIF <sup>a</sup> ) |
|--------------------------------------------------------------------------------|-------------|-------|------------------|---------|---------|---------------------------------------------|
| <b>Model 1: Knowledge score, F test (19,52046)=276.042, P&lt;.001</b>          |             |       |                  |         |         |                                             |
| Constant                                                                       | 22.045      | 0.149 | 21.752 to 22.338 | 147.512 | <.001   |                                             |
| <b>Sex (Reference group=Male)</b>                                              |             |       |                  |         |         |                                             |
| Female                                                                         | 0.353       | 0.037 | 0.281 to 0.426   | 9.513   | <.001   | 1.082                                       |
| <b>Age (years, Reference group=<math>\leq</math>20)</b>                        |             |       |                  |         |         |                                             |
| 21-30                                                                          | 1.542       | 0.106 | 1.334 to 1.751   | 14.506  | <.001   | 7.224                                       |
| 31-40                                                                          | 1.752       | 0.109 | 1.539 to 1.965   | 16.133  | <.001   | 8.821                                       |
| 41-50                                                                          | 1.474       | 0.112 | 1.255 to 1.694   | 13.193  | <.001   | 6.183                                       |
| 51-60                                                                          | 0.831       | 0.129 | 0.579 to 1.083   | 6.461   | <.001   | 2.919                                       |
| $\geq$ 61                                                                      | -0.299      | 0.257 | -0.804 to 0.205  | -1.162  | =.245   | 1.467                                       |
| <b>Educational level (Reference group=<math>\leq</math>Junior high school)</b> |             |       |                  |         |         |                                             |
| High school and technical secondary school                                     | 0.845       | 0.050 | 0.748 to 0.942   | 17.017  | <.001   | 1.515                                       |
| Junior college and bachelor                                                    | 1.885       | 0.051 | 1.786 to 1.984   | 37.312  | <.001   | 1.985                                       |
| $\geq$ Master                                                                  | 2.146       | 0.095 | 1.960 to 2.332   | 22.613  | <.001   | 1.296                                       |
| <b>Occupation (Reference group=Unemployed)</b>                                 |             |       |                  |         |         |                                             |
| Government agency and institution                                              | 0.926       | 0.131 | 0.669 to 1.182   | 7.071   | <.001   | 3.531                                       |
| Medical practitioner                                                           | 1.830       | 0.135 | 1.565 to 2.096   | 13.523  | <.001   | 2.872                                       |
| Enterprise                                                                     | 0.683       | 0.114 | 0.459 to 0.907   | 5.987   | <.001   | 9.525                                       |
| Business and service industry                                                  | 0.326       | 0.121 | 0.090 to 0.563   | 2.706   | =.007   | 4.710                                       |
| Farmer <sup>b</sup>                                                            | 0.250       | 0.138 | -0.021 to 0.521  | 1.810   | =.070   | 2.598                                       |
| Student                                                                        | 1.098       | 0.146 | 0.812 to 1.385   | 7.516   | <.001   | 6.500                                       |
| Freelancer                                                                     | 0.111       | 0.120 | -0.123 to 0.345  | 0.930   | =.352   | 4.879                                       |
| Retiree                                                                        | -0.021      | 0.247 | -0.504 to 0.463  | -0.083  | =.934   | 1.569                                       |
| Others                                                                         | 0.131       | 0.120 | -0.105 to 0.367  | 1.089   | =.276   | 4.613                                       |

|                                                                                |        |       |                  |         |       |       |
|--------------------------------------------------------------------------------|--------|-------|------------------|---------|-------|-------|
| <b>Place of residence (Reference group=Rural area)</b>                         |        |       |                  |         |       |       |
| Urban area                                                                     | 0.478  | 0.040 | 0.400 to 0.556   | 11.981  | <.001 | 1.146 |
| <i>Model 2: Skill score, F test (19,52046)=278.829, P&lt;.001</i>              |        |       |                  |         |       |       |
| Constant                                                                       | 19.936 | 0.142 | 19.657 to 20.215 | 140.158 | <.001 |       |
| <b>Sex (Reference group=Male)</b>                                              |        |       |                  |         |       |       |
| Female                                                                         | 0.439  | 0.035 | 0.370 to 0.509   | 12.428  | <.001 | 1.082 |
| <b>Age (years, Reference group=<math>\leq 20</math>)</b>                       |        |       |                  |         |       |       |
| 21-30                                                                          | 2.123  | 0.101 | 1.924 to 2.321   | 20.976  | <.001 | 7.224 |
| 31-40                                                                          | 2.401  | 0.103 | 2.198 to 2.603   | 23.227  | <.001 | 8.821 |
| 41-50                                                                          | 2.295  | 0.106 | 2.087 to 2.504   | 21.578  | <.001 | 6.183 |
| 51-60                                                                          | 1.570  | 0.122 | 1.330 to 1.810   | 12.825  | <.001 | 2.919 |
| $\geq 61$                                                                      | 0.719  | 0.245 | 0.239 to 1.199   | 2.935   | =.003 | 1.467 |
| <b>Educational level (Reference group=<math>\leq</math>Junior high school)</b> |        |       |                  |         |       |       |
| High school and technical secondary school                                     | 0.910  | 0.047 | 0.817 to 1.002   | 19.252  | <.001 | 1.515 |
| Junior college and bachelor                                                    | 1.789  | 0.048 | 1.694 to 1.883   | 37.203  | <.001 | 1.985 |
| $\geq$ Master                                                                  | 1.765  | 0.090 | 1.588 to 1.942   | 19.534  | <.001 | 1.296 |
| <b>Occupation (Reference group=Unemployed)</b>                                 |        |       |                  |         |       |       |
| Government agency and institution                                              | 0.760  | 0.125 | 0.516 to 1.004   | 6.098   | <.001 | 3.531 |
| Medical practitioner                                                           | 1.250  | 0.129 | 0.998 to 1.503   | 9.707   | <.001 | 2.872 |
| Enterprise                                                                     | 0.801  | 0.109 | 0.588 to 1.014   | 7.378   | <.001 | 9.525 |
| Business and service industry                                                  | 0.568  | 0.115 | 0.343 to 0.793   | 4.947   | <.001 | 4.710 |
| Farmer <sup>b</sup>                                                            | 0.334  | 0.131 | 0.076 to 0.592   | 2.540   | =.011 | 2.598 |
| Student                                                                        | 1.336  | 0.139 | 1.064 to 1.609   | 9.607   | <.001 | 6.500 |
| Freelancer                                                                     | 0.233  | 0.114 | 0.010 to 0.456   | 2.048   | =.041 | 4.879 |
| Retiree                                                                        | -0.147 | 0.235 | -0.608 to 0.313  | -0.627  | =.531 | 1.569 |
| Others                                                                         | 0.231  | 0.114 | 0.006 to 0.455   | 2.014   | =.044 | 4.613 |

| <b>Place of residence (Reference group=Rural area)</b>                         |        |       |                  |         |       |       |
|--------------------------------------------------------------------------------|--------|-------|------------------|---------|-------|-------|
| Urban area                                                                     | 0.323  | 0.038 | 0.248 to 0.397   | 8.504   | <.001 | 1.146 |
| <b>Model 3: Behavior score, F test (19,52046)=23.486, P&lt;.001</b>            |        |       |                  |         |       |       |
| Constant                                                                       | 30.118 | 0.105 | 29.912 to 30.325 | 286.196 | <.001 |       |
| <b>Sex (Reference group=Male)</b>                                              |        |       |                  |         |       |       |
| Female                                                                         | 0.067  | 0.026 | 0.016 to 0.118   | 2.555   | =.011 | 1.082 |
| <b>Age (years, Reference group=<math>\leq 20</math>)</b>                       |        |       |                  |         |       |       |
| 21-30                                                                          | 0.459  | 0.075 | 0.313 to 0.606   | 6.135   | <.001 | 7.224 |
| 31-40                                                                          | 0.769  | 0.076 | 0.619 to 0.919   | 10.055  | <.001 | 8.821 |
| 41-50                                                                          | 0.681  | 0.079 | 0.527 to 0.836   | 8.658   | <.001 | 6.183 |
| 51-60                                                                          | 0.516  | 0.091 | 0.339 to 0.694   | 5.701   | <.001 | 2.919 |
| $\geq 61$                                                                      | -0.212 | 0.181 | -0.567 to 0.144  | -1.168  | =.243 | 1.467 |
| <b>Educational level (Reference group=<math>\leq</math>Junior high school)</b> |        |       |                  |         |       |       |
| High school and technical secondary school                                     | 0.207  | 0.035 | 0.139 to 0.276   | 5.924   | <.001 | 1.515 |
| Junior college and bachelor                                                    | 0.071  | 0.036 | 0.001 to 0.141   | 1.991   | =.046 | 1.985 |
| $\geq$ Master                                                                  | -0.096 | 0.067 | -0.227 to 0.035  | -1.430  | =.153 | 1.296 |
| <b>Occupation (Reference group=Unemployed)</b>                                 |        |       |                  |         |       |       |
| Government agency and institution                                              | 0.726  | 0.092 | 0.546 to 0.907   | 7.880   | <.001 | 3.531 |
| Medical practitioner                                                           | 0.978  | 0.095 | 0.791 to 1.165   | 10.264  | <.001 | 2.872 |
| Enterprise                                                                     | 0.529  | 0.080 | 0.371 to 0.686   | 6.583   | <.001 | 9.525 |
| Business and service industry                                                  | 0.683  | 0.085 | 0.516 to 0.849   | 8.039   | <.001 | 4.710 |
| Farmer <sup>b</sup>                                                            | 0.444  | 0.097 | 0.253 to 0.634   | 4.561   | <.001 | 2.598 |
| Student                                                                        | 0.998  | 0.103 | 0.796 to 1.199   | 9.696   | <.001 | 6.500 |
| Freelancer                                                                     | 0.615  | 0.084 | 0.450 to 0.780   | 7.308   | <.001 | 4.879 |
| Retiree                                                                        | 0.737  | 0.174 | 0.396 to 1.078   | 4.239   | <.001 | 1.569 |
| Others                                                                         | 0.520  | 0.085 | 0.354 to 0.686   | 6.139   | <.001 | 4.613 |

**Place of residence (Reference group=Rural area)**

---

|            |       |       |                |       |       |       |
|------------|-------|-------|----------------|-------|-------|-------|
| Urban area | 0.135 | 0.028 | 0.080 to 0.190 | 4.809 | <.001 | 1.146 |
|------------|-------|-------|----------------|-------|-------|-------|

---

<sup>a</sup>VIF: variance inflation factor.

<sup>b</sup>“Farmer” includes agriculture, forestry, animal husbandry, sideline occupations, and fishery.

**Table S2.** Pearson Chi-square test for questions with high error rates in knowledge and skill sections, and questions with low proportion of “3 points” in behavior section.

| Characteristic                             | Initial symptoms | Transmission routes | Selection of disinfection products | Measures of home quarantine | Weekly disinfection | Distinction between common cold and COVID-19 <sup>a</sup> |
|--------------------------------------------|------------------|---------------------|------------------------------------|-----------------------------|---------------------|-----------------------------------------------------------|
| <b>Sex</b>                                 |                  |                     |                                    |                             |                     |                                                           |
| Male                                       | $\chi^2=87.8$    | $\chi^2=190.5$      | $\chi^2=121.8$                     | $\chi^2=47.0$               | $\chi^2=2.8$        | $\chi^2=23.7$                                             |
| Female                                     | $P<.001$         | $P<.001$            | $P<.001$                           | $P<.001$                    | $P=.429$            | $P<.001$                                                  |
| <b>Age (years)</b>                         |                  |                     |                                    |                             |                     |                                                           |
| ≤20                                        |                  |                     |                                    |                             |                     |                                                           |
| 21-30                                      |                  |                     |                                    |                             |                     |                                                           |
| 31-40                                      | $\chi^2=244.4$   | $\chi^2=1,005.0$    | $\chi^2=363.2$                     | $\chi^2=534.6$              | $\chi^2=432.9$      | $\chi^2=291.4$                                            |
| 41-50                                      | $P<.001$         | $P<.001$            | $P<.001$                           | $P<.001$                    | $P<.001$            | $P<.001$                                                  |
| 51-60                                      |                  |                     |                                    |                             |                     |                                                           |
| ≥61                                        |                  |                     |                                    |                             |                     |                                                           |
| <b>Educational level</b>                   |                  |                     |                                    |                             |                     |                                                           |
| ≤Junior high school                        |                  |                     |                                    |                             |                     |                                                           |
| High school and technical secondary school | $\chi^2=304.3$   | $\chi^2=1,257.6$    | $\chi^2=1,056.6$                   | $\chi^2=803.5$              | $\chi^2=410.1$      | $\chi^2=269.2$                                            |
| Junior college and bachelor                | $P<.001$         | $P<.001$            | $P<.001$                           | $P<.001$                    | $P<.001$            | $P<.001$                                                  |
| ≥Master                                    |                  |                     |                                    |                             |                     |                                                           |
| <b>Occupation</b>                          |                  |                     |                                    |                             |                     |                                                           |
| Government agency and institution          |                  |                     |                                    |                             |                     |                                                           |
| Medical practitioner                       |                  |                     |                                    |                             |                     |                                                           |
| Enterprise                                 |                  |                     |                                    |                             |                     |                                                           |
| Business and service industry              | $\chi^2=320.4$   | $\chi^2=1,031.6$    | $\chi^2=633.3$                     | $\chi^2=653.1$              | $\chi^2=356.8$      | $\chi^2=404.3$                                            |
| Farmer <sup>b</sup>                        | $P<.001$         | $P<.001$            | $P<.001$                           | $P<.001$                    | $P<.001$            | $P<.001$                                                  |
| Student                                    |                  |                     |                                    |                             |                     |                                                           |
| Freelancer                                 |                  |                     |                                    |                             |                     |                                                           |

---

|                           |               |                |                |  |               |               |               |
|---------------------------|---------------|----------------|----------------|--|---------------|---------------|---------------|
| Retiree                   |               |                |                |  |               |               |               |
| Unemployed                |               |                |                |  |               |               |               |
| Others                    |               |                |                |  |               |               |               |
| <b>Place of residence</b> |               |                |                |  |               |               |               |
| Urban area                | $\chi^2=38.4$ | $\chi^2=369.1$ | $\chi^2=217.6$ |  | $\chi^2=84.6$ | $\chi^2=22.2$ | $\chi^2=33.3$ |
| Rural area                | $P<.001$      | $P<.001$       | $P<.001$       |  | $P<.001$      | $P<.001$      | $P<.001$      |

---

<sup>a</sup>COVID-19: coronavirus disease 2019.

<sup>b</sup>“Farmer” includes agriculture, forestry, animal husbandry, sideline occupations, and fishery.

**Table S3.** Results of binary logistic regression analysis on factors influencing the choice for initial symptoms, transmission routes, disinfection products, measures of home quarantine, weekly disinfection, and distinction between common cold and COVID-19.

| Variable                                                                        | Initial symptoms          |         | Transmission routes       |         | Selection of disinfection products |         | Measures of home quarantine |         | Weekly disinfection       |         | Distinction between common cold and COVID-19 <sup>a</sup> |         |
|---------------------------------------------------------------------------------|---------------------------|---------|---------------------------|---------|------------------------------------|---------|-----------------------------|---------|---------------------------|---------|-----------------------------------------------------------|---------|
|                                                                                 | OR <sup>b</sup> (95% CI)  | P value | OR (95% CI)               | P value | OR (95% CI)                        | P value | OR (95% CI)                 | P value | OR (95% CI)               | P value | OR (95% CI)                                               | P value |
| Constant                                                                        | N/A <sup>c</sup>          | =.009   | N/A                       | <.001   | N/A                                | =.002   | N/A                         | <.001   | N/A                       | <.001   | N/A                                                       | <.001   |
| <b>Sex (Reference group=Male)</b>                                               |                           |         |                           |         |                                    |         |                             |         |                           |         |                                                           |         |
| Female                                                                          | 1.133<br>(1.091 to 1.176) | <.001   | 1.207<br>(1.159 to 1.258) | <.001   | 1.164<br>(1.117 to 1.212)          | <.001   | 1.114<br>(1.067 to 1.164)   | <.001   | N/A                       | N/A     | N/A                                                       | N/A     |
| <b>Age (years, Reference group=<math>\leq 20</math>)</b>                        |                           |         |                           |         |                                    |         |                             |         |                           |         |                                                           |         |
| 21-30                                                                           | 0.979<br>(0.878 to 1.091) | =.699   | 1.034<br>(0.918 to 1.164) | =.582   | 1.298<br>(1.154 to 1.459)          | <.001   | 1.642<br>(1.458 to 1.850)   | <.001   | 1.036<br>(0.913 to 1.175) | =.584   | 0.899<br>(0.787 to 1.027)                                 | =.116   |
| 31-40                                                                           | 1.057<br>(0.947 to 1.181) | =.325   | 0.949<br>(0.841 to 1.069) | =.388   | 1.332<br>(1.183 to 1.500)          | <.001   | 1.710<br>(1.515 to 1.929)   | <.001   | 1.423<br>(1.249 to 1.620) | <.001   | 1.129<br>(0.985 to 1.293)                                 | =.081   |
| 41-50                                                                           | 0.869<br>(0.776 to 0.974) | =.016   | 0.960<br>(0.848 to 1.086) | =.512   | 1.081<br>(0.957 to 1.222)          | =.208   | 1.619<br>(1.429 to 1.835)   | <.001   | 1.464<br>(1.279 to 1.675) | <.001   | 1.164<br>(1.011 to 1.340)                                 | =.035   |
| 51-60                                                                           | 0.718<br>(0.631 to 0.818) | <.001   | 0.695<br>(0.604 to 0.799) | <.001   | 0.943<br>(0.821 to 1.084)          | =.411   | 1.296<br>(1.123 to 1.495)   | <.001   | 1.494<br>(1.275 to 1.751) | <.001   | 1.070<br>(0.910 to 1.259)                                 | =.412   |
| $\geq 61$                                                                       | 0.739<br>(0.573 to 0.953) | =.020   | 0.420<br>(0.323 to 0.546) | <.001   | 0.862<br>(0.660 to 1.127)          | =.279   | 0.984<br>(0.749 to 1.294)   | =.909   | 1.158<br>(0.845 to 1.586) | =.361   | 1.029<br>(0.738 to 1.435)                                 | =.866   |
| <b>Educational level (Reference group=<math>\leq</math> Junior high school)</b> |                           |         |                           |         |                                    |         |                             |         |                           |         |                                                           |         |
| High school and technical secondary school                                      | 1.097<br>(1.044 to 1.152) | <.001   | 1.152<br>(1.094 to 1.213) | <.001   | 1.200<br>(1.139 to 1.264)          | <.001   | 1.168<br>(1.105 to 1.234)   | <.001   | 0.932<br>(0.874 to 0.994) | =.031   | 1.165<br>(1.093 to 1.241)                                 | <.001   |
| Junior college and bachelor                                                     | 1.298                     | <.001   | 1.747                     | <.001   | 1.649                              | <.001   | 1.459                       | <.001   | 0.672                     | <.001   | 1.008                                                     | =.799   |



|                                                        |                  |       |                  |       |                  |       |                  |       |                  |       |                  |       |
|--------------------------------------------------------|------------------|-------|------------------|-------|------------------|-------|------------------|-------|------------------|-------|------------------|-------|
|                                                        | (1.235 to 1.364) |       | (1.654 to 1.845) |       | (1.562 to 1.741) |       | (1.379 to 1.544) |       | (0.631 to 0.716) |       | (0.948 to 1.072) |       |
| ≥Master                                                | 1.432            | <.001 | 2.235            | <.001 | 1.847            | <.001 | 1.368            | <.001 | 0.517            | <.001 | 0.871            | =.017 |
|                                                        | (1.299 to 1.578) |       | (1.989 to 2.512) |       | (1.651 to 2.065) |       | (1.222 to 1.531) |       | (0.464 to 0.577) |       | (0.778 to 0.975) |       |
| <b>Occupation (Reference group=Unemployed)</b>         |                  | <.001 |                  | <.001 |                  | <.001 |                  | <.001 |                  | <.001 |                  | <.001 |
| Government agency and institution                      | 1.404            | <.001 | 1.302            | <.001 | 1.251            | =.002 | 1.291            | =.001 | 1.459            | <.001 | 1.430            | <.001 |
|                                                        | (1.230 to 1.603) |       | (1.125 to 1.506) |       | (1.085 to 1.443) |       | (1.110 to 1.501) |       | (1.252 to 1.699) |       | (1.223 to 1.673) |       |
| Medical practitioner                                   | 1.583            | <.001 | 1.771            | <.001 | 1.948            | <.001 | 1.946            | <.001 | 2.370            | <.001 | 2.843            | <.001 |
|                                                        | (1.379 to 1.818) |       | (1.515 to 2.070) |       | (1.668 to 2.275) |       | (1.649 to 2.296) |       | (2.000 to 2.808) |       | (2.367 to 3.414) |       |
| Enterprise                                             | 1.080            | =.182 | 1.036            | =.565 | 1.156            | =.018 | 1.239            | =.001 | 1.217            | =.003 | 1.134            | =.062 |
|                                                        | (0.964 to 1.210) |       | (0.918 to 1.170) |       | (1.025 to 1.305) |       | (1.091 to 1.408) |       | (1.068 to 1.388) |       | (0.994 to 1.294) |       |
| Business and service industry                          | 1.077            | =.224 | 0.952            | =.455 | 1.027            | =.683 | 1.134            | =.068 | 1.430            | <.001 | 1.480            | <.001 |
|                                                        | (0.956 to 1.215) |       | (0.838 to 1.083) |       | (0.904 to 1.166) |       | (0.991 to 1.298) |       | (1.242 to 1.647) |       | (1.283 to 1.708) |       |
| Farmer <sup>d</sup>                                    | 1.123            | =.096 | 0.980            | =.779 | 1.109            | =.162 | 1.082            | =.310 | 1.470            | <.001 | 1.234            | =.012 |
|                                                        | (0.980 to 1.288) |       | (0.848 to 1.132) |       | (0.959 to 1.281) |       | (0.929 to 1.260) |       | (1.242 to 1.742) |       | (1.048 to 1.454) |       |
| Student                                                | 1.311            | <.001 | 1.161            | =.067 | 1.430            | <.001 | 1.346            | <.001 | 1.740            | <.001 | 1.596            | <.001 |
|                                                        | (1.132 to 1.519) |       | (0.990 to 1.363) |       | (1.220 to 1.675) |       | (1.143 to 1.585) |       | (1.468 to 2.063) |       | (1.338 to 1.902) |       |
| Freelancer                                             | 1.031            | =.618 | 0.939            | =.330 | 0.966            | =.584 | 1.033            | =.634 | 1.477            | <.001 | 1.403            | <.001 |
|                                                        | (0.915 to 1.160) |       | (0.827 to 1.066) |       | (0.852 to 1.095) |       | (0.904 to 1.179) |       | (1.283 to 1.701) |       | (1.218 to 1.616) |       |
| Retiree                                                | 0.951            | =.684 | 0.867            | =.270 | 0.907            | =.450 | 0.931            | =.596 | 1.316            | =.079 | 1.471            | =.017 |
|                                                        | (0.746 to 1.212) |       | (0.673 to 1.117) |       | (0.704 to 1.169) |       | (0.715 to 1.213) |       | (0.969 to 1.787) |       | (1.071 to 2.021) |       |
| Others                                                 | 1.113            | =.080 | 0.899            | =.102 | 0.995            | =.944 | 0.997            | =.961 | 1.364            | <.001 | 1.233            | =.004 |
|                                                        | (0.987 to 1.254) |       | (0.792 to 1.021) |       | (0.877 to 1.130) |       | (0.872 to 1.139) |       | (1.185 to 1.569) |       | (1.071 to 1.420) |       |
| <b>Place of residence (Reference group=Rural area)</b> |                  |       |                  |       |                  |       |                  |       |                  |       |                  |       |
| Urban area                                             | N/A              | N/A   | 1.206            | <.001 | 1.058            | =.010 | N/A              | N/A   | 1.053            | =.042 | N/A              | N/A   |
|                                                        |                  |       | (1.156 to 1.258) |       | (1.013 to 1.104) |       |                  |       | (1.002 to 1.106) |       |                  |       |

<sup>a</sup>COVID-19: coronavirus disease 2019.

<sup>b</sup>OR: odds ratio.

<sup>c</sup>N/A: not applicable.

<sup>d</sup>“Farmer” includes agriculture, forestry, animal husbandry, sideline occupations, and fishery.

**Table S4.** Proportion of information channels and reliable information sources for different characteristics (%).

| Characteristic                             | Information channels               |                                    |           |                                             |                                                   |        | Reliable information sources                 |                               |                                    |                             |        |
|--------------------------------------------|------------------------------------|------------------------------------|-----------|---------------------------------------------|---------------------------------------------------|--------|----------------------------------------------|-------------------------------|------------------------------------|-----------------------------|--------|
|                                            | Government's WeChat public account | WeChat and WeChat group of friends | Microblog | TV, government's websites, and news outlets | Communication between people around and relatives | Others | government's media and WeChat public account | authoritative medical experts | WeChat and WeChat group of friends | people around and relatives | Others |
| <b>Sex</b>                                 |                                    |                                    |           |                                             |                                                   |        |                                              |                               |                                    |                             |        |
| Male                                       | 89.15                              | 64.52                              | 47.54     | 88.67                                       | 47.38                                             | 30.33  | 93.93                                        | 88.03                         | 7.10                               | 6.63                        | 33.61  |
| Female                                     | 85.67                              | 64.81                              | 55.93     | 88.57                                       | 48.41                                             | 29.19  | 91.19                                        | 89.07                         | 6.49                               | 5.95                        | 33.76  |
| <b>Age (years)</b>                         |                                    |                                    |           |                                             |                                                   |        |                                              |                               |                                    |                             |        |
| ≤20                                        | 76.40                              | 60.38                              | 47.77     | 79.93                                       | 46.04                                             | 32.55  | 84.50                                        | 82.23                         | 10.55                              | 9.68                        | 33.85  |
| 21-30                                      | 87.53                              | 65.57                              | 61.18     | 87.97                                       | 49.74                                             | 29.26  | 93.89                                        | 89.93                         | 6.71                               | 6.26                        | 32.15  |
| 31-40                                      | 89.56                              | 66.40                              | 49.77     | 90.93                                       | 48.21                                             | 28.66  | 94.02                                        | 89.74                         | 6.43                               | 5.86                        | 33.43  |
| 41-50                                      | 90.60                              | 63.84                              | 45.09     | 90.30                                       | 46.19                                             | 31.31  | 93.51                                        | 88.74                         | 6.16                               | 5.81                        | 35.94  |
| 51-60                                      | 88.12                              | 60.84                              | 39.72     | 88.25                                       | 45.43                                             | 30.58  | 93.30                                        | 84.96                         | 5.54                               | 5.48                        | 34.74  |
| ≥61                                        | 81.44                              | 52.35                              | 28.81     | 80.89                                       | 41.27                                             | 29.64  | 83.66                                        | 79.22                         | 8.03                               | 7.48                        | 33.24  |
| <b>Educational level</b>                   |                                    |                                    |           |                                             |                                                   |        |                                              |                               |                                    |                             |        |
| ≤Junior high school                        | 81.52                              | 54.58                              | 40.77     | 84.24                                       | 38.64                                             | 25.12  | 87.92                                        | 84.42                         | 7.06                               | 6.55                        | 33.38  |
| High school and technical secondary school | 87.88                              | 63.42                              | 48.62     | 89.57                                       | 46.38                                             | 27.94  | 93.77                                        | 88.89                         | 7.30                               | 6.79                        | 35.10  |
| Junior college and bachelor                | 91.66                              | 71.42                              | 59.12     | 91.21                                       | 54.48                                             | 34.28  | 95.72                                        | 91.04                         | 6.40                               | 5.90                        | 33.65  |
| ≥Master                                    | 89.76                              | 73.78                              | 57.15     | 87.87                                       | 53.67                                             | 30.64  | 91.48                                        | 88.53                         | 6.92                               | 6.47                        | 27.82  |
| <b>Occupation</b>                          |                                    |                                    |           |                                             |                                                   |        |                                              |                               |                                    |                             |        |
| Government agency and institution          | 93.77                              | 74.85                              | 58.01     | 90.56                                       | 55.97                                             | 34.09  | 95.33                                        | 90.84                         | 8.10                               | 7.54                        | 30.46  |
| Medical practitioner                       | 93.31                              | 76.22                              | 66.31     | 91.96                                       | 63.46                                             | 46.52  | 94.65                                        | 93.72                         | 10.81                              | 9.42                        | 44.43  |
| Enterprise                                 | 91.03                              | 65.55                              | 50.35     | 90.94                                       | 48.11                                             | 29.24  | 95.28                                        | 90.21                         | 4.94                               | 4.86                        | 33.19  |

|                               |       |       |       |       |       |       |       |       |       |      |       |
|-------------------------------|-------|-------|-------|-------|-------|-------|-------|-------|-------|------|-------|
| Business and service industry | 87.79 | 64.07 | 51.73 | 89.33 | 46.78 | 25.67 | 93.96 | 88.45 | 6.79  | 6.30 | 33.85 |
| Farmer <sup>a</sup>           | 85.21 | 58.13 | 44.03 | 86.85 | 41.17 | 23.17 | 89.93 | 84.34 | 9.59  | 8.20 | 32.45 |
| Student                       | 78.79 | 63.54 | 52.61 | 82.35 | 49.50 | 32.38 | 87.03 | 84.47 | 10.48 | 9.13 | 33.28 |
| Freelancer                    | 84.99 | 60.17 | 47.50 | 87.79 | 42.65 | 24.23 | 91.15 | 86.96 | 6.86  | 6.27 | 32.01 |
| Retiree                       | 82.86 | 54.76 | 33.10 | 85.71 | 40.48 | 25.71 | 88.81 | 84.52 | 7.14  | 6.90 | 32.14 |
| Unemployed                    | 81.33 | 59.73 | 45.99 | 85.69 | 40.77 | 27.40 | 89.41 | 86.19 | 6.08  | 6.08 | 32.26 |
| Others                        | 85.04 | 61.09 | 49.00 | 86.43 | 44.54 | 32.97 | 90.75 | 87.05 | 5.87  | 5.63 | 35.16 |
| <b>Place of residence</b>     |       |       |       |       |       |       |       |       |       |      |       |
| Urban area                    | 89.10 | 66.15 | 52.28 | 89.35 | 49.22 | 30.04 | 93.53 | 89.22 | 6.35  | 5.98 | 33.02 |
| Rural area                    | 84.95 | 61.68 | 48.68 | 87.22 | 45.06 | 29.48 | 91.33 | 87.00 | 7.82  | 7.05 | 34.96 |
| <b>Total</b>                  | 87.69 | 64.64 | 51.06 | 88.63 | 47.81 | 29.85 | 92.78 | 88.47 | 6.85  | 6.35 | 33.67 |

<sup>a</sup>“Farmer” includes agriculture, forestry, animal husbandry, sideline occupations, and fishery.

**Table S5.** Proportion of information needs for different characteristics (%).

| Characteristic                             | Daily protection knowledge | Latest epidemic development | Disease treatment progress | Current status of epidemic area prevention and control | Material supply | Social dynamics | Others |
|--------------------------------------------|----------------------------|-----------------------------|----------------------------|--------------------------------------------------------|-----------------|-----------------|--------|
| <b>Sex</b>                                 |                            |                             |                            |                                                        |                 |                 |        |
| Male                                       | 79.29                      | 90.04                       | 80.74                      | 75.23                                                  | 63.77           | 63.46           | 18.91  |
| Female                                     | 80.06                      | 89.35                       | 81.40                      | 73.59                                                  | 63.96           | 59.71           | 17.58  |
| <b>Age (years)</b>                         |                            |                             |                            |                                                        |                 |                 |        |
| ≤20                                        | 78.57                      | 82.58                       | 74.58                      | 66.27                                                  | 53.90           | 49.91           | 21.17  |
| 21-30                                      | 77.14                      | 90.09                       | 84.23                      | 74.05                                                  | 66.42           | 62.98           | 17.62  |
| 31-40                                      | 80.49                      | 90.88                       | 82.96                      | 76.85                                                  | 66.14           | 64.52           | 17.13  |
| 41-50                                      | 81.68                      | 91.04                       | 79.01                      | 75.99                                                  | 63.12           | 62.49           | 19.43  |
| 51-60                                      | 81.33                      | 90.33                       | 73.71                      | 73.38                                                  | 59.58           | 60.44           | 20.42  |
| ≥61                                        | 75.35                      | 84.21                       | 64.54                      | 65.65                                                  | 46.81           | 55.12           | 22.99  |
| <b>Educational level</b>                   |                            |                             |                            |                                                        |                 |                 |        |
| ≤Junior high school                        | 79.32                      | 85.07                       | 75.53                      | 70.42                                                  | 56.16           | 53.88           | 16.77  |
| High school and technical secondary school | 80.59                      | 90.87                       | 81.59                      | 76.91                                                  | 63.72           | 63.93           | 16.97  |
| Junior college and bachelor                | 79.81                      | 92.35                       | 84.64                      | 76.45                                                  | 69.08           | 66.66           | 20.55  |
| ≥Master                                    | 74.31                      | 89.59                       | 79.84                      | 70.18                                                  | 66.04           | 58.17           | 16.43  |
| <b>Occupation</b>                          |                            |                             |                            |                                                        |                 |                 |        |
| Government agency and institution          | 81.75                      | 91.65                       | 82.29                      | 75.44                                                  | 68.04           | 62.25           | 20.23  |
| Medical practitioner                       | 85.08                      | 94.09                       | 87.14                      | 82.46                                                  | 73.82           | 71.88           | 28.95  |
| Enterprise                                 | 80.28                      | 91.46                       | 83.05                      | 76.41                                                  | 66.67           | 65.05           | 17.27  |
| Business and service industry              | 78.48                      | 90.79                       | 82.26                      | 75.36                                                  | 65.00           | 63.56           | 16.32  |
| Farmer <sup>a</sup>                        | 79.78                      | 84.56                       | 76.49                      | 73.58                                                  | 58.39           | 54.27           | 14.79  |
| Student                                    | 80.17                      | 85.02                       | 77.28                      | 68.53                                                  | 56.89           | 53.39           | 20.99  |

|                           |       |       |       |       |       |       |       |
|---------------------------|-------|-------|-------|-------|-------|-------|-------|
| Freelancer                | 77.33 | 89.33 | 78.19 | 72.72 | 60.08 | 59.65 | 14.71 |
| Retiree                   | 78.81 | 90.48 | 69.76 | 69.29 | 55.24 | 58.10 | 19.05 |
| Unemployed                | 75.68 | 87.55 | 77.75 | 71.39 | 59.23 | 58.37 | 15.16 |
| Others                    | 77.70 | 87.65 | 79.77 | 72.83 | 61.24 | 60.11 | 21.35 |
| <b>Place of residence</b> |       |       |       |       |       |       |       |
| Urban area                | 79.58 | 90.65 | 81.81 | 74.89 | 65.32 | 62.62 | 18.05 |
| Rural area                | 79.67 | 88.00 | 79.46 | 73.86 | 60.99 | 60.45 | 18.95 |
| <b>Total</b>              | 79.61 | 89.75 | 81.01 | 74.54 | 63.85 | 61.89 | 18.35 |

<sup>a</sup>“Farmer” includes agriculture, forestry, animal husbandry, sideline occupations, and fishery.
